# Health Extension Workers Improve Tuberculosis Case Detection and Treatment Success in Southern Ethiopia: A Community Randomized Trial

Daniel G. Datiko<sup>1,2\*</sup>, Bernt Lindtjørn<sup>1</sup>

<sup>1</sup> Centre for International Health, University of Bergen, Bergen, Norway, <sup>2</sup> Southern Nations, Nationalities, and Peoples' Regional Health Bureau, Awassa, Ethiopia

## Abstract

**Background:** One of the main strategies to control tuberculosis (TB) is to find and treat people with active disease. Unfortunately, the case detection rates remain low in many countries. Thus, we need interventions to find and treat sufficient number of patients to control TB. We investigated whether involving health extension workers (HEWs: trained community health workers) in TB control improved smear-positive case detection and treatment success rates in southern Ethiopia.

**Methodology/Principal Finding:** We carried out a community-randomized trial in southern Ethiopia from September 2006 to April 2008. Fifty-one kebeles (with a total population of 296, 811) were randomly allocated to intervention and control groups. We trained HEWs in the intervention kebeles on how to identify suspects, collect sputum, and provide directly observed treatment. The HEWs in the intervention kebeles advised people with productive cough of 2 weeks or more duration to attend the health posts. Two hundred and thirty smear-positive patients were identified from the intervention and 88 patients from the control kebeles. The mean case detection rate was higher in the intervention than in the control kebeles (122.2% vs 69.4%,  $p < 0.001$ ). In addition, more females patients were identified in the intervention kebeles (149.0 vs 91.6,  $p < 0.001$ ). The mean treatment success rate was higher in the intervention than in the control kebeles (89.3% vs 83.1%,  $p = 0.012$ ) and more for females patients (89.8% vs 81.3%,  $p = 0.05$ ).

**Conclusions/Significance:** The involvement of HEWs in sputum collection and treatment improved smear-positive case detection and treatment success rate, possibly because of an improved service access. This could be applied in settings with low health service coverage and a shortage of health workers.

**Trial Registration:** ClinicalTrials.gov NCT00803322

**Citation:** Datiko DG, Lindtjørn B (2009) Health Extension Workers Improve Tuberculosis Case Detection and Treatment Success in Southern Ethiopia: A Community Randomized Trial. PLoS ONE 4(5): e5443. doi:10.1371/journal.pone.0005443

**Editor:** Delia Goletti, National Institute for Infectious Diseases (INMI) L. Spallanzani, Italy

**Received:** November 25, 2008; **Accepted:** March 21, 2009; **Published:** May 8, 2009

**Copyright:** © 2009 Datiko, Lindtjørn. This is an open-access article distributed under the terms of the Creative Commons Attribution License, which permits unrestricted use, distribution, and reproduction in any medium, provided the original author and source are credited.

**Funding:** The University of Bergen funded this study. The university had no role in the design, data collection, analysis and interpretation or writing of the report.

**Competing Interests:** The authors have declared that no competing interests exist.

\* E-mail: danieljohn42@yahoo.com

## Introduction

Each year, more than nine million new cases of tuberculosis (TB) occur and about two million people die of TB. As a result of the interaction between TB and human immunodeficiency virus (HIV) infection, TB incidence is rising in sub-Saharan Africa. It has also led to an increase in drug resistance and poor treatment outcomes [1].

Information from South India shows that directly observed treatment, short-course (DOTS) reduces TB incidence [2]. However, in many other countries, the case detection rates are too low to reduce the incidence of TB. The main obstacles are low health service coverage, shortage of health workers and poor programme performance [3].

Epidemiological models show that active case finding might reduce TB incidence and avoid TB deaths. Although active case finding is effective in contact tracing on a small scale, high cost and poor treatment adherence limit its use [4,5].

We therefore need alternative methods to improve TB case finding.

In Ethiopia, the National TB and Leprosy Control Programme (NTLCP) started to implement DOTS in 1992. NTLCP is responsible for policy formulation, resource mobilisation, monitoring and evaluation. Under the NTLCP, three levels of function exist in the regions, zones and districts for coordinating TB control activities. TB control is also integrated into the general service at health facilities. The district TB programme coordinator is responsible for supervision of the general health workers involved in patient care in hospitals and health centres. However, community DOTS was not started.

Ethiopia has the seventh highest TB burden in the world. In 2006, the estimated number of new smear-positive cases was 168 per 10<sup>5</sup> for Ethiopia. Unfortunately, the case detection rate was 27%, far below the target [6]. In 2004, the government of Ethiopia launched a community-based initiative to provide essential health services to the community under a health extension programme

(HEP) to ensure equitable access to health services. The aim of the HEP is to prevent major communicable diseases and promote health in the community. A new cadre of community level health workers, health extension workers (HEWs), was trained for 1 year at an undergraduate level. With the aim of preventing major communicable diseases, HEWs are trained on how to identify and refer TB suspects, trace defaulters, and provide treatment and health education [6,7]. However, their role in TB control has not been evaluated. The aim of the present study was to establish whether involving HEWs in TB control improved smear-positive case detection and treatment success rates in southern Ethiopia.

## Methods

The protocol for this trial and supporting CONSORT checklist are available as supporting information; see Checklist S1 and Protocol S1.

### Study area and population

This study was conducted in Dale and Wonsho, rural districts of Sidama zone in southern Ethiopia from September 2006 to April 2008. There were 51 kebeles (lowest administrative units) in the two districts. Fifty-five per cent of the population live within two-hour walking distance of health facilities. There were 21 health posts (operational unit for HEWs), two health stations, two nucleus health centres (health stations upgrading to health centres) and one health centre. Three health facilities (one health centre and two health stations) conducted sputum microscopy, and DOT was provided in the health centre, nucleus health centres and health stations. None of the health posts provide DOT.

### Health service and HEP

The Government of Ethiopia has a four-tier health service, and the lowest level is a primary health care unit (a health centre and five satellite health posts). On average, a health post serves a kebele with 5000 people. The health policy focuses on provision of preventive and promotive health care to the population under the HEP, which involves prevention and control of diseases, including TB. The local health authorities in consultation with kebele leaders select two female residents, who have completed tenth grade, from each kebele. The women receive training for 1 year and are placed as HEWs in their respective kebele. They receive a salary from the government and they are accountable to the health centre [7].

### Participants

#### TB case finding and treatment outcome

**Case finding.** TB suspects, who had cough for two weeks or more, were referred for further investigations. A smear-positive pulmonary TB case was defined by two positive sputum smears or one positive smear and x-ray findings consistent with active TB.

**Treatment regimen and duration.** The treatment regimen for new smear-positive cases consisted of two months intensive phase treatment with ethambutol, rifampicin, isoniazid and pyrazinamide followed by continuation phase treatment for 6 months with ethambutol and isoniazid. For children, in the continuation phase, ethambutol/isoniazid was replaced by rifampicin/isoniazid for 4 months. Follow-up sputum smear examination was done at the end of 2, 5 and 7 months treatment.

**Treatment outcome.** A patient with at least two negative smears including that at 7 months was reported as cured. A patient who finished the treatment but did not have the 7-month smear

result was reported as treatment completed. If a patient remained or became smear-positive at the end of 5 months or later, he/she was reported as treatment failure. A patient who missed treatment for eight consecutive weeks after receiving treatment for at least 4 weeks was reported as a defaulter. A patient who was transferred to another district after receiving treatment for at least 4 weeks and whose treatment outcome was not reported to the referring district was reported as transferred out. A patient who died while on treatment was reported as dead irrespective of the cause of death [8].

**Ethics.** We obtained ethical clearance from the Ethical Review Committee of the Regional Health Bureau in southern Ethiopia. We obtained permission from TB programme managers and kebele leaders after discussing with them community-based TB care. TB patients were enrolled after giving informed consent after explaining the aim of the study and the right to refuse or to withdraw from the study. HIV testing was not offered to TB patients because of the unavailability of HIV testing and treatment in the study area at the time the study was conducted.

### The intervention

**Training on how to identify TB suspects and administer DOT.** We trained health workers, laboratory technicians and HEWs for 2 days. The training focused on symptoms and transmission of TB, how to identify TB suspects, how to collect, label, store and transport sputum specimens, administer DOT, and follow patients during treatment. The messages and the content of our training were similar to the curriculum of training HEWs. HEWs, in the in the intervention kebeles, received on job training about how to collect sputum samples and support patients to adhere to treatment. HEWs collected sputum specimens once a month. An ice box was used to keep the sputum specimens in the health post and during their transportation on foot to diagnostic units. The intervention included sputum collection and providing DOT.

During health education sessions at health posts, HEWs informed people living in the kebele about TB and advised them to come to a health post if they had productive cough of 2 weeks or more duration. TB suspects who came to the health posts were told about community-based TB care. HEWs collected spot-morning-spot sputum specimens, and labelled and transported them to the diagnostic units every month for examination for acid-fast bacilli by direct microscopy. Smear-positive patients in the intervention kebeles received standard DOTS under the direct observation of HEWs. TB patients visited health posts daily during the intensive phase and once a month in the continuation phase.

### Control kebeles

**Identifying TB suspects and DOT administration.** HEWs in the in the control kebeles did not received on job training about how to collect sputum samples and how to support patients to adhere to treatment. However, they provided health services, including health education about TB, to the people living in their kebeles. TB suspects presented themselves to diagnostic units. However, the health workers from health facilities were trained as they provided the service to intervention and control kebeles. Smear-positive patients in the control kebeles received standard DOTS were treated under the direct observation of general health workers at health centres. TB patients visited health centres and health stations daily during the intensive phase and once a month in the continuation phase.

**Objective.** the objective of the study was to investigate whether involving HEWs in TB control improves the case detection and treatment success rate in southern Ethiopia

### Outcome variables

**Case detection rate.** the number of new smear-positive cases detected divided by the estimated number of incident smear-positive cases, expressed as a percentage.

**Treatment success rate.** cure or treatment completion rate was calculated as the number of patients cured or treatment completed divided by the total number of patients reported expressed as a percentage. Treatment success rate (TSR) was the sum of cure and treatment completion rate.

### Sample size calculation

The sample size was calculated based on a difference in effect size of 30%, power of 80%, 95% significance level, and coefficient of variation of 0.25. Based on the average annual smear-positive case detection rate (CDR) of 41% (unpublished review of three years of DOTS in the study area; the national CDR was 29%), we calculated the number of clusters required per group with 30% contingency. Based on the principle of allocating an unequal number of clusters for randomization [9], we allocated 30 kebeles to the intervention and 21 kebeles to the control group.

### Randomization: generation and implementation

Before starting the intervention, we explained the aim of the study to the programme coordinators of the districts and health facilities. After we obtained their consent, we used the list of kebeles in the two districts and randomly allocated them to

intervention and control groups using a table of random numbers (Figure 1).

### Blinding

Neither the general health workers nor TB programme managers were blinded to the allocation. Although we did not blind the laboratory technicians, they were not informed whether the sputum specimens were from the intervention or control kebeles.

### Data collection

TB case finding and treatment outcome data were collected from TB registers at health facilities and districts. The information collected included date, age, sex, address, TB classification, smear results and treatment outcome using the official reporting system of the NTLCP.

### Statistical analysis

We used Microsoft excel and SPSS for Windows 14 (SPSS Inc, Chicago, USA) for data entry and analysis. We analysed the data on the basis that all TB patients in the intervention kebeles intended to use community-based case finding and treatment. We described the patients by age, sex, season and treatment outcome. We calculated summary values of case detection and treatment success rates for each kebele. We used independent sample *t* test, weighted by cluster size, to compare the mean CDR and TSR using kebele as a unit of analysis. This is robust for cluster level analysis of binary outcomes [9]. The intra-cluster correlation coefficient was calculated using one-way analysis of variance [10,11].

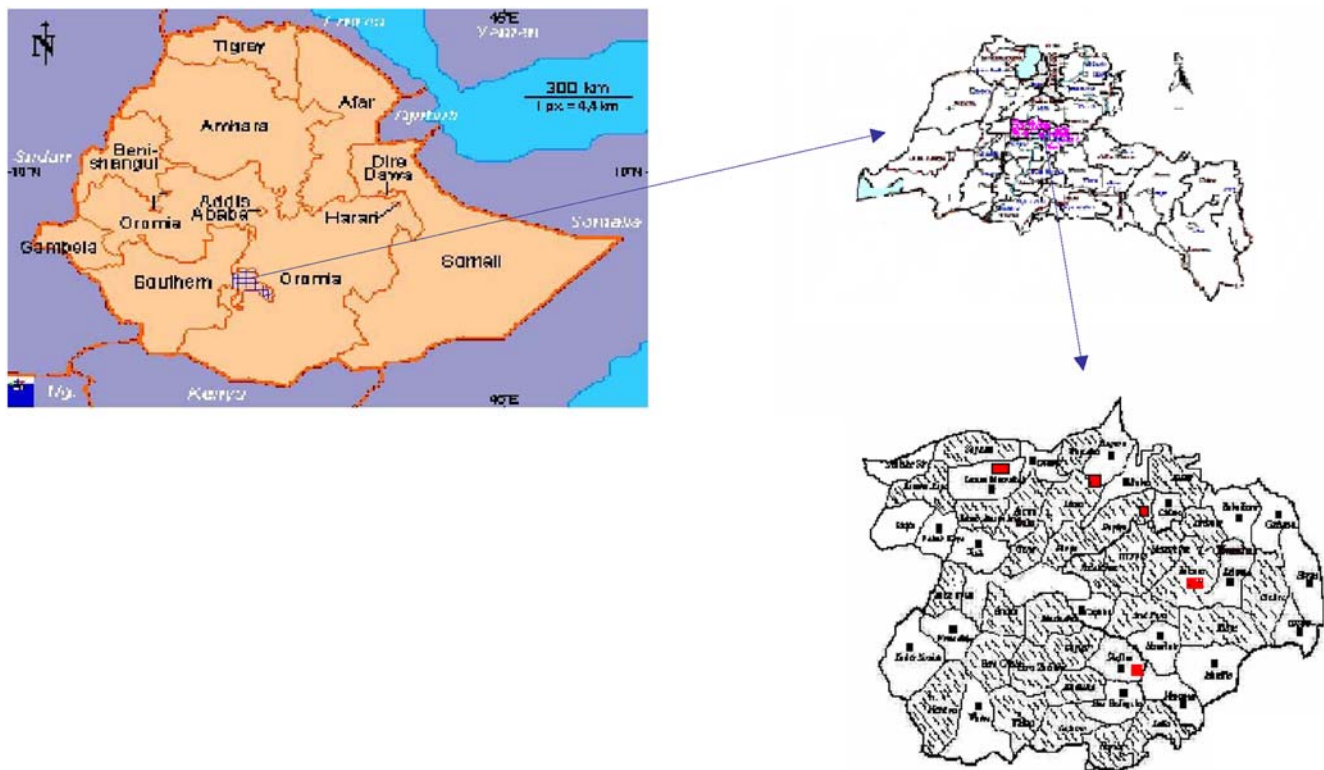

**Figure 1. Map of the study area in Sidama zone in south Ethiopia.** Shaded area - Intervention kebeles. White area with black box - Control kebeles. Red box - Health centers and health stations.  
doi:10.1371/journal.pone.0005443.g001

## Results

### Participants flow, recruitment and number analysed

In a year, the number of pulmonary TB suspects examined was 723 from intervention and 328 from control kebeles. Among these, 230 and 88 smear-positive patients were identified from the intervention and control kebeles, respectively. All the smear-positive patients were analyzed (figure 2).

### Baseline data

Of the 51 kebeles included in the study, 30 were intervention kebeles with a population of 178,138 and mean kebele population of 5938 people, while 21 were control kebeles with a population of 118,673 and mean kebele population of 5651 people. 53.4% (123/230) of patients from intervention and 42% (37/88) from control kebeles were female (Table 1).

### Outcomes and estimation

Patients from control kebeles were younger than those from intervention kebeles (26 *vs* 29 years,  $p=0.011$ ). The mean CDR was higher in intervention kebeles (122.2% *vs* 69.4%,  $p<0.001$ ) and for female patients (149.0% *vs* 91.6%,  $p<0.001$ ) (Table 2).

Among the 230 patients from the intervention kebeles, 172 (74.8%) were cured, 33 (14.3%) completed treatment, eight (3.5%) died, two (0.9%) had treatment failure, 15 (6.5%) defaulted and no patient was transferred out. Of the 88 patients in the control kebeles, 60 (68.2%) were cured, 14 (15.9%) completed treatment, two (2.3%) died, nine (10.2%) defaulted, three (3.4%) were transferred out, and none had treatment failure (Figure 2). The mean TSR was higher in the intervention than control kebeles

(89.3% *vs* 83.1%,  $p=0.012$ ). Similarly, the mean TSR for females was higher in the intervention than control kebeles (89.8 *vs* 81.3%,  $p=0.05$ ) as shown in Table 3.

## Discussion

### Interpretation and overall evidences

We showed that involving HEWs in TB control improved the smear-positive CDR and TSR in the intervention kebeles. Both the CDR and TSR were higher for female patients in the intervention kebeles.

DOTS uses passive case finding to detect TB cases, through health education and tracing contacts of index cases [6]. However, decades after implementing the strategy, smear-positive CDR has remained far below the target. In particular, the trend in CDR was consistently low for women, to the extent that passive case finding seems to favour men [12,13,14,15]. The reasons are low health service coverage, shortage of trained health workers and poor health seeking behaviour [3,16,17]. Alternatively the advantage of active case finding in improving case detection is limited due to the associated high cost in resource-constrained settings [5,18]. Moreover, neither rapid community surveys [19,20] nor community DOT [21,22] seems to improve CDR.

In our study, community-based case finding significantly improved the CDR for all age groups more for women than for men. The increase in CDR was lower for children compared to those aged 15 years and above. This could be explained by an inability to produce sputum specimens, low disease burden, or the low number of children enrolled in the study [23]. Patients from the intervention kebeles were older than those from control kebeles for both sexes. This may have been caused by poor access,

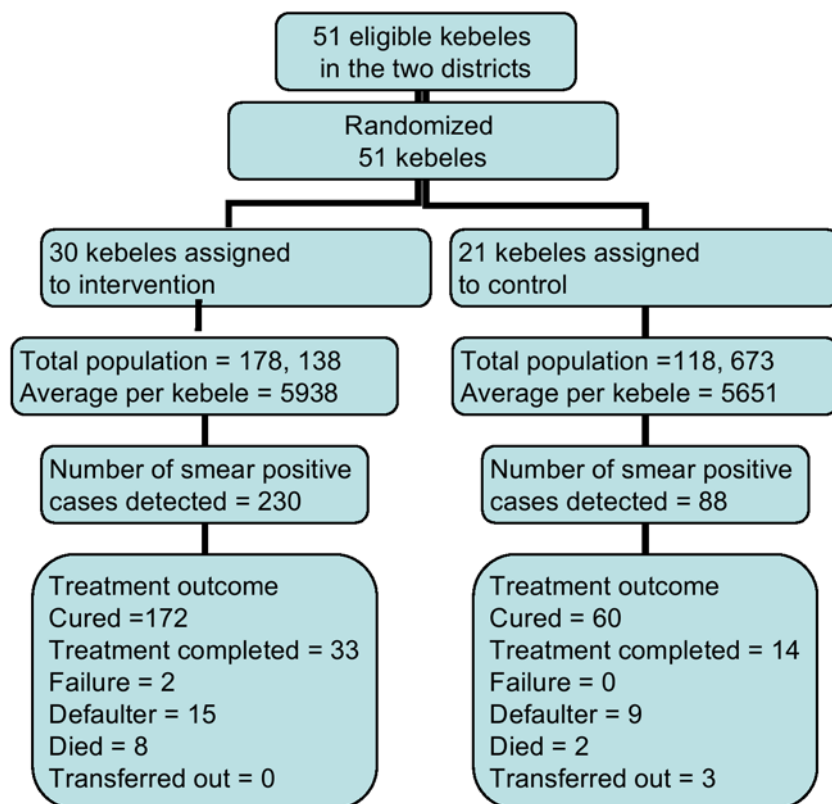

**Figure 2. Trial profile for smear-positive TB case finding and treatment outcome.**  
doi:10.1371/journal.pone.0005443.g002

**Table 1.** The baseline characteristics of the study area and smear-positive tuberculosis cases of southern Ethiopia 2006/07.

| Variable                                | Intervention | Control   |
|-----------------------------------------|--------------|-----------|
| <b>Communities</b>                      |              |           |
| Number of clusters                      | 30           | 21        |
| Study population                        | 178, 138     | 118, 673  |
| Male                                    | 91,206       | 63,464    |
| Female                                  | 86,932       | 55,209    |
| Mean kebele population                  | 5938         | 5651      |
| Male                                    | 3040         | 3022      |
| Female                                  | 2898         | 2629      |
| <b>Smear-positive TB patients</b>       |              |           |
| Mean age (SD)                           | 29 (13)      | 26 (11)   |
| Male                                    | 29 (13)      | 26 (13)   |
| Female                                  | 29 (13)      | 24 (8)    |
| Number (%) of TB cases by sex           |              |           |
| Male                                    | 107 (46.6)   | 51 (58)   |
| Female                                  | 123 (53.4)   | 37 (42)   |
| Number (%) of TB cases by age(in years) |              |           |
| ≤14                                     | 23 (10.0)    | 9 (10.3)  |
| 15–24                                   | 63 (27.4)    | 34 (39.1) |
| 25–34                                   | 72 (31.3)    | 28 (32.2) |
| 35–44                                   | 58 (25.2)    | 13 (14.9) |
| 45–54                                   | 14 (6.1)     | 3 (3.4)   |
| Number (%) of TB cases by season        |              |           |
| Spring                                  | 55 (23.9)    | 29 (33.0) |
| Winter                                  | 69 (30.0)    | 18 (20.4) |
| Autumn                                  | 45 (19.6)    | 22 (25.0) |
| Summer                                  | 61 (26.5)    | 19 (21.6) |

doi:10.1371/journal.pone.0005443.t001

poverty, and low health seeking behaviour that might have hindered them from coming to the health facilities.

Routine surveillance reports have repeatedly shown higher CDRs for men than women [24]. However, in our study, the CDR was higher for females in the intervention group. This could be explained by the improved geographic and socioeconomic access to the service as sputum collection was done in the intervention kebeles. As expected, the number of TB cases detected was greater than that estimated. This may have resulted from underestimation of TB incidence as reported from Myanmar [8], the backlog of TB cases that were not reached by the health service [19,24], or underestimation of the population in the study area. Further study is required to determine the magnitude of TB in the community.

Studies have shown that using different treatment supervisors for DOT has improved the TSR for passively detected TB cases [25,26,27]. However, poor treatment adherence remains a challenge for patients identified by active and enhanced case finding [28]. In our study, decentralisation of the treatment to the kebele improved the TSR for TB patients detected by enhanced case finding. Similar to CDR, the TSR was higher for women aged above 14 years because of improved access created by DOT provision in the kebele.

Our findings suggest seasonal variation in CDR and TSR. In the intervention kebeles, the rates peaked in spring (September–November) and winter (December–February) possibly as a result of the economic gain from the harvest in spring. However, in the intervention and control kebeles, the rates were low in autumn (March–May) when farmers prepare for the farming season, and this was followed by another peak in early summer (June–August). Previous studies have suggested that overcrowding and staying indoors during the rainy season favour transmission of TB, which results in greater seasonal variation in children [29,30,31]. In our setting, further study is required to establish more about the seasonal variation and its associated factors.

Although cluster randomized controlled trials are considered valid studies, their methodological limitations should be addressed. The baseline demographic and clinical characteristics were similar in the two groups. We kept potential for bias to a minimum by comparing and analysing information from complementary

**Table 2.** Case detection rates of smear-positive tuberculosis cases in southern Ethiopia, 2006/07.

| Variable                   | Intervention | Control | Mean difference (95%CI) | P - value | ICC*    |
|----------------------------|--------------|---------|-------------------------|-----------|---------|
| <b>CDR† (%)</b>            | 122.2        | 69.4    | 52.8 (39.8–65.4)        | <0.001    | 0.00052 |
| Male                       | 112.6        | 86.0    | 26.6 (7.1–46.0)         | 0.008     | 0.00039 |
| Female                     | 149.0        | 91.6    | 57.4 (31.9–82.9)        | <0.001    | 0.00073 |
| <b>For ≤14 years (%)</b>   | 82.9         | 31.9    | 50.9 (26.8–75.2)        | <0.001    | 0.00049 |
| Male                       | 69.8         | 44.1    | 25.6 (5.4–45.9)         | 0.018     | 0.00024 |
| Female                     | 115.6        | 45.5    | 70.1 (29.–110.6)        | 0.002     | 0.00065 |
| <b>For &gt;14years (%)</b> | 193.7        | 118.2   | 75.5 (55.6–95.5)        | <0.001    | 0.00060 |
| Male                       | 184.7        | 149.4   | 35.3 (4.2–66.5)         | 0.027     | 0.00038 |
| Female                     | 235.9        | 170.9   | 64.9 (15.6–114.4)       | 0.011     | 0.00098 |
| <b>By season (%)</b>       |              |         |                         |           |         |
| Spring                     | 227.1        | 104.2   | 122.9 (70.9–174.9)      | <0.001    | 0.00136 |
| Winter                     | 138.5        | 80.8    | 57.7 (36.2–79.2)        | <0.001    | 0.00013 |
| Autumn                     | 136.2        | 114.2   | 21.8 (–19.4–62.9)       | 0.294     | 0.00061 |
| Summer                     | 169.5        | 87.4    | 82.0 (50.9–113.1)       | <0.001    | 0.00069 |

\*ICC - intraclass correlation coefficient.

†CDR - case detection rate.

doi:10.1371/journal.pone.0005443.t002

**Table 3.** Treatment success rates of smear-positive tuberculosis cases in southern Ethiopia, 2006/07.

| Variable                           | Intervention | Control | Mean difference (95%CI) | P - value | ICC*    |
|------------------------------------|--------------|---------|-------------------------|-----------|---------|
| <b>TSR<sup>†</sup> for all (%)</b> | 89.3         | 83.1    | 6.2 (1.4–10.9)          | 0.012     | 0.00052 |
| Male                               | 87.0         | 84.3    | 2.7 (–4.8–0.2)          | 0.471     | 0.00017 |
| Female                             | 90.9         | 81.1    | 9.9 (1.6–18.2)          | 0.202     | 0.00035 |
| <b>For ≤14 years (%)</b>           | 91.3         | 88.9    | 2.4 (–17.4–22.2)        | 0.805     | 0.00028 |
| Male                               | 87.5         | 75.0    | 12.5 (–64.6–89.6)       | 0.657     | 0.00003 |
| Female                             | 93.3         | 100     | –6.7 (–31.4–18.0)       | 0.578     | 0.00017 |
| <b>For &gt;14years (%)</b>         | 88.9         | 80.8    | 8.2 (2.6–13.8)          | 0.005     | 0.00029 |
| Male                               | 88.0         | 80.4    | 7.6 (–1.5–16.6)         | 0.101     | 0.00009 |
| Female                             | 89.8         | 81.3    | 8.6 (–0.1–17.3)         | 0.05      | 0.00019 |
| <b>By season (%)</b>               |              |         |                         |           |         |
| Spring                             | 89.1         | 89.6    | –0.6 (–10.0–8.9)        | 0.906     | 0.00024 |
| Winter                             | 84.1         | 93.8    | –9.9 (–20.9–1.6)        | 0.090     | 0.00004 |
| Autumn                             | 73.3         | 68.2    | 5.2 (–15.4–25.8)        | 0.619     | 0.00013 |
| Summer                             | 83.6         | 89.5    | –5.9 (–22.4–10.7)       | 0.470     | 0.00018 |

\*ICC - intraclass correlation coefficient.

†treatment success rate.

doi:10.1371/journal.pone.0005443.t003

sources. Although we did not blind the sputum samples sent to the diagnostic units, the laboratory technicians received the standard information for sputum analysis, and were not informed if the sputum specimens were from an intervention or control kebele. In addition, external quality control was performed for the slides examined in health facilities at the Centre for Health and Research Laboratory in the southern Ethiopia. In our sample size calculations, the intraclass correlation was small. The CDR and TSR in the control group was 45% and 83%, respectively, which was similar to the CDR of 40% in the intervention and 42% in the control kebeles, and TSR of 78% in the intervention and 74% in the control kebeles (unpublished review of 3 years of DOTS in the study area), which suggests the completeness of our data collection. However, as control and intervention kebeles were neighbouring each other and health facilities delivered the service to both groups, we cannot rule out the effect of the intervention in the control kebeles. This might have reduced the effect size in the intervention kebeles.

Our intervention used enhanced case finding, a variant of active case finding, in which HEWs encouraged TB suspects to visit health posts for sputum collection, and provided DOT. The strength of the study was that it included a sufficient number of clusters to address an important challenge of DOTS strategy, namely low CDR, and improved treatment adherence of patients identified by enhanced case finding by providing DOT. It also explored a practical way of involving HEWs in TB control under the community-based initiative of HEP in Ethiopia.

### Generalizability

The results of our study could be applied in settings with low health service coverage (low DOTS coverage and limited number of TB laboratories), where HEWs have the first contact with the people to provide health education, and collect and transport sputum specimens to diagnostic units. This makes the service patient-centred, to improve case finding and treatment adherence [22]. Our study area is a densely populated agrarian community, typical of the rural population on the Ethiopian highlands. It could also be applied in areas with a shortage of health workers,

especially laboratory technicians, with or without adequate health service coverage. The findings of the study were disseminated to managers of TB programmes in the southern region and at national level. We believe our findings are relevant for policy formulation on community TB care in Ethiopia. With limited health care coverage and shortage of health workers, similar to that in many developing countries, we believe that our findings are applicable to similar settings.

In conclusion, involving HEWs in TB control improved the CDR and TSR for smear-positive patients and females in particular. It could be used as an option to improve the trend in low CDR and provide patient-centred services in high-burden countries. However, the cost-effectiveness of enhanced case finding and treatment outcome needs further study.

### Supporting Information

#### Checklist S1 CONSORT Checklist

Found at: doi:10.1371/journal.pone.0005443.s001 (0.06 MB DOC)

#### Protocol S1 Trial Protocol

Found at: doi:10.1371/journal.pone.0005443.s002 (0.27 MB DOC)

### Acknowledgments

We are grateful to Regional Health Bureau, Sidama Zone Health Department, Dale and Wonsho Woreda Health Office and TB programme coordinators for their technical and material support. We are grateful to health workers and laboratory technicians in the health facilities and HEWs in the intervention kebeles. We are also thankful to TB patients who voluntarily participated in the study. Special thanks go to Dr. Estifanos Biru for his technical support and provision of resources for data analysis.

### Author Contributions

Conceived and designed the experiments: DGD BL. Performed the experiments: DGD. Analyzed the data: DGD BL. Wrote the paper: DGD BL. Supervised the conduct of the experiment: BL.

## References

1. Harries A, DermotMaher, StephanGraham (2004) TB/HIV: A Clinical Manual. Geneva, Switzerland: WHO. 210 p.
2. Subramani R, Radhakrishna S, Frieden TR, Kolappan C, Gopi PG, et al. (2008) Rapid decline in prevalence of pulmonary tuberculosis after DOTS implementation in a rural area of South. India *Int J Tuberc Lung Dis* 12: 916–920(915).
3. Dye C, Watt CJ, Bleed DM, Williams BG (2003) What is the limit to case detection under the DOTS strategy for tuberculosis control? *Tuberculosis* 83: 35–43.
4. Murray CJ, Salomon JA (1998) Expanding the WHO tuberculosis control strategy: rethinking the role of active case finding. *Int J Tuberc Lung Dis* 2: S9–S15.
5. Golub JE, Mohan CI, Comstock GW, Chaisson RE (2005) Active case finding of tuberculosis: historical perspective and future prospects. *Int J Tuberc Lung Dis* 9: 1183–1203.
6. Federal Ministry of Health of Ethiopia (2008) Tuberculosis, Leprosy and TB/HIV Prevention and Control Manual. Addis Ababa, Ethiopia: Ministry of Health.
7. Federal Ministry of Health of Ethiopia (2005) Essential health Service Package for Ethiopia, Health FMO, editor. Addis Ababa: Artistic printing Enterprise.
8. World Health Organization (2008) Global Tuberculosis Control, surveillance, planning and financing. Geneva, Switzerland: World Health Organization. pp 1–304.
9. Donner A, Klar N (2000) Design and analysis of cluster randomization trials in health research. London: Arnold.
10. Donner A, N. K (1994) Methods for comparing event rates in intervention studies when the unit of allocation is a cluster. *Am J Epidemiology* 140: 279–289.
11. Ukoumunne OC, Gulliford MC, Chinn S, Sterne JA, Burney PG (1999) Methods for evaluating area-wide and organization-based interventions in health and health care: a systematic review. *Health Technol Assess* 3: 92.
12. Kivihya-Ndugga LE, van Cleeff MR, Ng'ang'a LW, Meme H, Odhiambo JA, et al. (2005) Sex-specific performance of routine TB diagnostic tests. *Int J Tuberc Lung Dis* 9: 294–300.
13. Agboatwalla M, Kazi GN, Shah SK, Tariq M (2003) Gender perspectives on knowledge and practices regarding tuberculosis in urban and rural areas in Pakistan. *East Mediterr Health J* 9: 732–740.
14. Ahsan G, Ahmed J, Singhasivanon P, Kaewkungwal J, Okanurak K, et al. (2004) Gender difference in treatment seeking behaviors of tuberculosis cases in rural communities of Bangladesh. *Southeast Asian J Trop Med Public Health* 35: 126–135.
15. Hamid Salim MA, Declercq E, Van Deun A, Saki KA (2004) Gender differences in tuberculosis: a prevalence survey done in Bangladesh. *Int J Tuberc Lung Dis* 8: 952–957.
16. Dye C, HosseiniMehran, WattCatherine (2007) Did we reach the 2005 targets for tuberculosis control? *Bulletin of the World Health Organization* 85: 364–369.
17. Wahyuni C, Budiono X, Rahariyani LD, Sulistyowati M, Rachmawati T, et al. (2007) Obstacles for optimal tuberculosis case detection in primary health centers (PHC) in Sidoarjo district, East Java, Indonesia. *BMC Health Serv Res* 7: 135.
18. Enarson DA (2000) World tuberculosis control: how far have we to go? *Int J Tuberc Lung Dis* 4: 219–223.
19. Shargie EB, Morkve O, Lindtjorn B (2006) Tuberculosis case-finding through a village outreach programme in a rural setting in southern Ethiopia: community randomized trial. *Bull World Health Organ* 84: 112–119.
20. Santha T, Renu G, Frieden TR, Subramani R, Gopi PG, et al. (2003) Are community surveys to detect tuberculosis in high prevalence areas useful? Results of a comparative study from Tiruvallur District, South India. *Int J Tuberc Lung Dis* 7: 258–265.
21. Omaswa F (2003) The Community TB Care in Africa. *Int J Tuberc Lung Dis* 7: S1–S102.
22. World Health Organization (2003) Community TB care: Practice and Policy.
23. Shargie EB, Yassin MA, Lindtjorn B (2006) Prevalence of smear-positive pulmonary tuberculosis in a rural district of Ethiopia. *Int J Tuberc Lung Dis* 10: 87–92.
24. World Health Organization (2007) Global Tuberculosis Control, surveillance, planning and financing. Geneva, Switzerland. pp 1–270.
25. Wandwalo E, Kapalata N, Egwaga S, Morkve O (2004) Effectiveness of community-based directly observed treatment for tuberculosis in an urban setting in Tanzania: a randomised controlled trial. *Int J Tuberc Lung Dis* 8: 1248–1254.
26. Singh AA, Parasher D, Shekhavat GS, Sahu S, Wares DF, et al. (2004) Effectiveness of urban community volunteers in directly observed treatment of tuberculosis patients: a field report from Haryana, North India. *Int J Tuberc Lung Dis* 8: 800–802.
27. Kangangi JK, Kibuga D, Muli J, Maher D, Billo N, et al. (2003) Decentralisation of tuberculosis treatment from the main hospitals to the peripheral health units and in the community within Machakos district, Kenya. *Int J Tuberc Lung Dis* 7: S5–13.
28. Golub JE, Mohan CI, Comstock GW, Chaisson RE (2005) Active case finding of tuberculosis: historical perspective and future prospects. *Int J Tuberc Lung Dis* 9: 1183–1203.
29. Leung CC, Yew WW, Chan TY, Tam CM, Chan CY, et al. (2005) Seasonal pattern of tuberculosis in Hong Kong. *Int J Epidemiol* 34: 924–930.
30. Thorpe LE, Frieden TR, Laserson KF, Wells C, Khatri GR (2004) Seasonality of tuberculosis in India: is it real and what does it tell us? *Lancet* 364: 1613–1614.
31. Luquero FJ, Sanchez-Padilla E, Simon-Soria F, Eiros JM, Golub JE (2008) Trend and seasonality of tuberculosis in Spain, 1996–2004. *Int J Tuberc Lung Dis* 12: 221–224.
